1 **Post-operative pain management practice and associated factors among nurses working at**  
2 **public hospitals, in Oromia region, Ethiopia**

3 **Authors and their affiliation**

4 Abebe Dechasa<sup>1¶\*</sup>, Abdo Kurke<sup>2¶</sup>, Desalegn Abdisa<sup>2¶</sup>, Yonas Gurmu<sup>1&</sup>

5 <sup>1</sup>Department of nursing, college of medicine and health science, Ambo University, Ethiopia.

6 Teaching and Referral hospital, college of medicine and health science, Ambo University,  
7 Ethiopia.

8 **Authors address**

9 Abebe Dechasa (Assistant professor, adult health nurse): [abebe.dechasa@ambou.edu.et](mailto:abebe.dechasa@ambou.edu.et)

10 Abdo Kurke (MSC, registered nurse): [abdokurke4235@gmail.com](mailto:abdokurke4235@gmail.com)

11 Desalegn Abdisa (assistant professor, surgeon): [desabdisa63@gmail.com](mailto:desabdisa63@gmail.com)

12 Yonas Gurmu (Lecturer, MSc Adult health Nurse): [yonasgurmu@gmail.com](mailto:yonasgurmu@gmail.com)

13 **\*Corresponding author:**

14 Email, [deebisa@gmail.com](mailto:deebisa@gmail.com) or [abebe.dechasa@ambou.edu.et](mailto:abebe.dechasa@ambou.edu.et)

15 **Abstract**

16 **Background:** Management of postoperative pain leads to positive patient progress and shortens  
17 the duration of hospital stay. Nurses, who are the majority in almost all hospitals and spend most  
18 of their time with the patients, are expected to play big role in the postoperative pain

19 management practice. However, there is paucity of information regarding postoperative pain  
20 management practice and its associated factors among nurses.

21 **Objective:** To assess postoperative pain management practice and associated factors among  
22 nurses working at public hospitals, in Oromia Region, Ethiopia, 2020.

23 **Methods:** Institutional based cross sectional study was employed among randomly selected 377  
24 nurses working at public hospitals in Oromia region, Ethiopia. Data was collected by distributing  
25 structured self-administered questionnaires that adapted from different literatures. The data were  
26 entered into Epi data version 3.1 and exported to SPSS version 22 for analysis. Variables with  
27 significant association in the bivariate analyses were entered into a multivariable regression  
28 analysis to identify the independent factors associated with nurses' postoperative pain  
29 management practice. Significant factors were declared at  $P < 0.05$ .

30 **Result:** The result showed that, 66% of nurses had good pain management practice. Nurses  
31 favorable attitude towards post-operative pain management [AOR: 4.698, 95% CI: (2.725-  
32 8.100)], having access to read pain management guideline [AOR: 3.112, 95% CI: (1.652-5.862)],  
33 adequate knowledge of post-operative pain management [AOR: 2.939, 95% CI: (1.652-5.227)],  
34 working at Operation Room [AOR: 2.934, 95% CI: (1.27-6.795)] and received training on pain  
35 management [AOR: 3.289, 95% CI: (1.461-7.403)] were significantly associated with the  
36 practices of postoperative pain management.

37 **Conclusion and recommendation:** Sixty six percent of participants (nurses) have a good level  
38 of practice of postoperative pain management. Training on post-operative pain management  
39 (POPM), access to pain management guidelines, knowledge and attitude are significant factors in  
40 post-operative pain management practice. Governmental and other bodies concerned to post-

41 operative care quality needs to show commitment on availing infrastructures like pain  
42 management guideline and improving nurses knowledge and attitude.

43 **Keywords:** *Postoperative, pain management, knowledge, Attitude and practice*

## 44 **Introduction**

45 Post-operative pain (POP) is a form of acute pain following surgical trauma (1) as a result of the  
46 inflammatory reaction and initiation of afferent neurological barriers. The pain is felt in response  
47 to the inflammatory process resulted from tissue injury during surgical procedure like skin  
48 incision, tissue dissection, manipulation and traction (2). Unless adequately managed post-  
49 operative pain management can be complicated to delayed ambulation, reduced patient  
50 satisfaction and increased incidence of pulmonary complication(3).

51 Currently, it was estimated that about 28-32% of global disease requires surgical intervention  
52 (4). Over five million surgical interventions are needed in Ethiopia each year (5). The rise in the  
53 number of operations is not without risk. For instance, in the United States, between 10% and  
54 60% and in Ethiopia 22% of patients were developed chronic pains as results of poorly managed  
55 postoperative pain (6, 7). Furthermore poorly managed postoperative pain can have a negative  
56 impact and is always associated with delayed mobility which can lead to delayed wound healing,  
57 deep vein thrombosis, pulmonary complications secondary to suppression of effective coughing,  
58 anxiety, sleep disturbance, myocardial infarction, depressed immune function and also can  
59 progress to chronic pain which impairs the ability to carry out daily activities and finally may  
60 leads to diminished quality of life (8).

61 Since, pain relief has been recognized as a human right and also considered as the “fifth” vital  
62 sign that must be regularly assessed and managed, the nurses should give inordinate attention to  
63 control postoperative pain(9). The roles and responsibilities of nurses in pain management;  
64 according to American nurses association (ANA), includes, assessment of pain, plan for pain  
65 management strategies and evaluation of responses of the patients for the given interventions and  
66 to take actions accordingly. Since, nurses are always spending 24 hours at bedside to give care  
67 for the patients and also they are the point of contact between other health professionals and the  
68 patients, they are expected to play vital role in postoperative pain management practice (10).

69 Post-operative pain management practice is a set of activities and an important aspect of nursing  
70 care to alleviate pain for the patients by pharmacologic and non-pharmacologic methods. These  
71 activities include assessing the pain, providing appropriate interventions to relieve the pain and  
72 reassessing the patients’ pain after intervention. Assessing pain is the first and crucial step for  
73 properly managing pain. Techniques for pain assessments include patients self-report and  
74 observing for patients’ physiological and behavioral responses to pain. The self-reporting  
75 methods include numeric rating scale (NRS), verbal rating scale (VRS), visual analogue scale  
76 (VAS) and the faces pain scale (FPS) (11).

77 Although, postoperative pain management continues to be a problem in developed and  
78 developing countries, sadly the suffering from untreated postoperative pain is larger and more  
79 worrying among the economically disadvantageous individuals in developing countries.

80 Alleviating patients suffering is a core ethical and legal obligation for health professionals.  
81 However, in Ethiopia, discomfort due to post-operative pain remains prevalent and affects  
82 between 47%-100% of patients after surgery (7).

83 Undertreated POP can contribute to different socio economic burden such as increasing health  
84 care cost by delaying discharge directly and indirectly as a result of absenteeism from job or loss  
85 of production. Nowadays, there is a growing awareness on the etiology of pain and an  
86 advancement of pharmacological and non-pharmacological pain management. Despite of this,  
87 patients still experience unacceptable pain after surgical procedures. The study was conducted by  
88 aiming to identify nurses post-operative pain management practice at public hospitals found in  
89 Oromia, Ethiopia; so that the finding will best serve to prioritize the problem and develop  
90 strategies for improving post-operative pain management.

## 91 **Methods**

### 92 **Study area, period and design**

93 The study was done at public hospitals found in West Shoa zone, Oromia regional state, Ethiopia  
94 from June 1 to August 30/2020. There are one referral, three general and four districts (total of  
95 eight public hospitals) in that zone. These hospitals provide different health service ranging  
96 from prevention of disease to surgical therapies for peoples in the area and closer zones in the  
97 Oromia region. So that post-operative nursing care is given for patients in need of the services.  
98 Cross sectional study design was implemented to identify post-operative pain management  
99 practice and associated factors among those nurses.

## 100 **Population**

### 101 **Source Population**

102 All nurses, who were working in surgical ward, Minor operation room (OR) and Major operation  
103 room (OR), Recovery rooms, Emergency, obstetrics and gynecology wards were included.

### 104 **Study Population**

105 All randomly selected nurses working in surgical ward, minor OR, major OR, recovery room,  
106 emergency room, obstetrics and gynecology wards were considered the study population.

### 107 **Sample size determination**

108 The sample size was determined by using single population proportion formula by considering  
109 that 65.2% nurses had good post-operative pain management practice (12) at a 5% level of  
110 significance, 5% margin of error and considering 10% non-response rate. With this calculation  
111 the final sample size was 384.

### 112 **Sampling techniques**

113 All public hospitals in the study area were included in the study. The total calculated sample size  
114 (384 nurses) was proportionally allocated to each hospital based on the number of their  
115 professional nurse. Finally by using the registration number of nurses at each hospital,  
116 participants of the study were selected randomly by the lottery methods.

### 117 **Study variables**

118 **Dependent variable:** level of Post-operative pain management practice

119 **Independent variables:** Socio demographic characteristics (Sex, Age, Marital Status,  
120 Educational status, Experience, Working unit/ward), Knowledge towards postoperative pain

121 management, Attitude towards postoperative pain management, organizational factors  
122 (Availability of standardized tools, Guideline, Training on pain management).

## 123 **Operational definitions**

124 **Good Practice:** Refers to those study participants, who have scored mean and/or above the value  
125 of the total 18 practice questions.

126 **Poor Practice:** Refers to those study participants who have scored below the mean value of the  
127 total 18 practice questions.

128 **Knowledge:** Is measured by fifteen items in yes/no format. Correct answer was given “1” and  
129 “0” was given for incorrect and for not sure. Those who scored mean and above were labeled as  
130 having adequate knowledge where as those who scored less than mean labeled as having  
131 inadequate knowledge about post-operative pain management.

132 **Attitude:** Is measured by nine items in agree/disagree format. For correctly responded item “1”  
133 was given and “0” was given for incorrect and don’t know. Those who scored mean and above  
134 considered as having favorable attitude where as those who scored below mean have unfavorable  
135 attitude towards postoperative pain management (12-14).

## 136 **Data collection tool and data quality control**

137 Structured self-administered questionnaire was used to collect data. The questioners were  
138 adapted from different studies conducted previously and modified. To assure the data quality,  
139 data collection tool was prepared after the intensive reviewing of relevant literatures and similar  
140 studies. The tool was reviewed by expert’s panels. One clinical nurse specialist, three lecturers  
141 (masters of Science in nursing) and one registered nurse (BSC nurse) were participated in the  
142 panel (review of the questionnaire). The questionnaire was pretested on 5% of the study

143 population at similar health care facilities. Training was given for data collectors by the principal  
144 investigator.

## 145 **Data processing and analysis**

146 The collected data was coded, cleaned, and entered in to Epi Data version 3.1 software and finally  
147 exported to statistical package for social study (SPSS) version 22 Software for analysis.  
148 Descriptive analyses were performed first to understand the general characteristics of all the  
149 study variables. The results were presented in tables and graphs using summary measures such as  
150 percentages and mean. Bivariate logistic regression was carried out to identify the factors  
151 associated with nurses' postoperative pain management practice. Hosmer-Lemeshow test was  
152 done to test for model fitness, the result was 0.45. Variables with  $p < 0.25$  in the bivariate  
153 analyses were entered into a multivariable logistic regression analysis to identify the independent  
154 factors associated with the outcome variable. Finally, the result of bivariate and multivariable  
155 logistic regression analysis was presented in a crude odds ratio (COR) and adjusted odds ratio  
156 (AOR) with 95% confidence intervals.  $P \leq 0.05$  was considered statistically significant.

## 157 **Result**

### 158 **Socio-demographic characteristics**

159 A total of 384 questionnaires were distributed, of which 377 were completed and returned with  
160 the response rate of 98.2%. The majority of participants, 227(60.2%) were male, 200(53.1%)  
161 were married and 240 (63.7%) were between the age group of 26 and 34 years (**Table 1**).



162 **Table 1:** Socio-demographic characteristics of respondents, working at public hospitals in  
 163 Oromia region, Ethiopia, 2020

| Variables                                   | Category        | Frequency(n=377) | Percentage (%) |
|---------------------------------------------|-----------------|------------------|----------------|
| Sex                                         | Male            | 227              | 60.2           |
|                                             | Female          | 150              | 39.8           |
| Age                                         | < 25            | 71               | 18.8           |
|                                             | 26-34           | 240              | 63.7           |
|                                             | >35             | 66               | 17.5           |
| Ethnicity                                   | Oromo           | 360              | 95.5           |
|                                             | Amhara          | 17               | 4.5            |
| Marital status                              | Married         | 200              | 53.1           |
|                                             | Single          | 177              | 46.9           |
| Religion                                    | Protestant      | 217              | 57.6           |
|                                             | Orthodox        | 103              | 27.3           |
|                                             | Muslims         | 40               | 10.6           |
|                                             | Wakefata        | 17               | 4.5            |
| Educational level                           | Diploma         | 28               | 7.4            |
|                                             | Bachelor degree | 346              | 91.8           |
|                                             | Masters         | 3                | 0.8            |
| Years of experience                         | <5              | 234              | 62.1           |
|                                             | 6-9             | 75               | 19.9           |
|                                             | >10             | 68               | 18             |
| Work experience in surgical unit (in years) | <1              | 199              | 52.8           |
|                                             | 2-4             | 140              | 37.1           |

|                          |                 |     |      |
|--------------------------|-----------------|-----|------|
|                          | >5              | 38  | 10.1 |
| Current area of practice | Medical ward    | 65  | 17.2 |
|                          | Emergence ward  | 70  | 18.6 |
|                          | Ob/Gyne ward    | 65  | 17.2 |
|                          | OR and Recovery | 72  | 19.1 |
|                          | Surgical ward   | 105 | 27.9 |

## 164 **Knowledge of nurses towards post-operative pain management**

165 The mean score for knowledge was 8.89 with standard deviation of ( $\pm 2.85$ ). Thus, the results  
 166 revealed that, from the total of 377 study participants, about 54.9 % (95% CI: (50.1, 60.2)) had  
 167 adequate knowledge about POP management (**figure 1**).

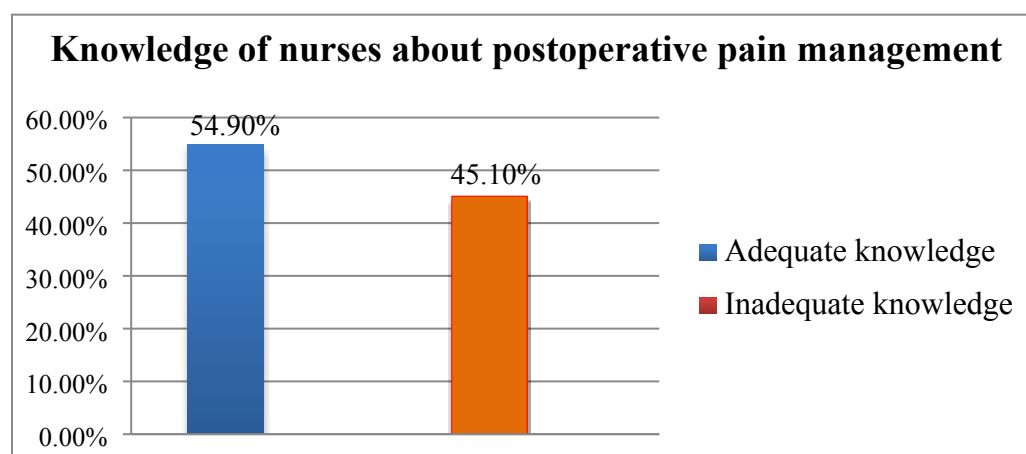

168  
 169 **Figure 1:** Knowledge levels of nurses on postoperative pain management at public hospitals in  
 170 Oromia region, Ethiopia, 2020.

## 171 **Nurses' attitude of postoperative pain management**

172 The mean score for attitude was computed and it was 4.99 with standard deviation of 1.73.  
 173 According to the classification outlined in the operational definition the percentage score of the

174 categories showed that, among 377 respondents, 59.4% (95% CI: (54.6, 64.5)) of participants  
 175 had favorable attitude towards post-operative pain management practice (**figure 2**).

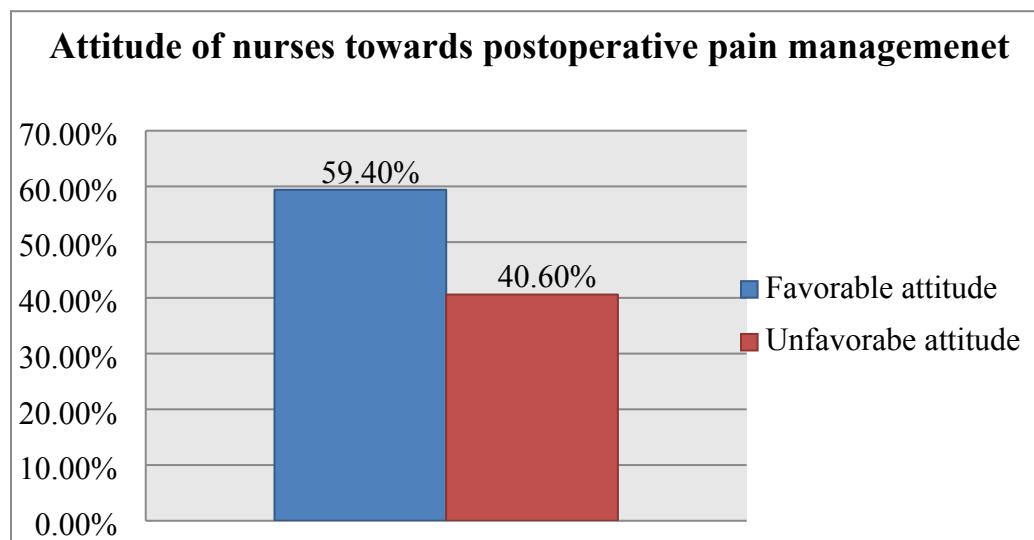

176  
 177 **Figure 2:** Attitude levels of nurses towards postoperative pain management at public hospitals in  
 178 west shoa zone, Ethiopia, 2020.

### 179 **Practices of nurses on postoperative pain management**

180 The responses of nurses to the nine practice questions are computed and dichotomized in to good  
 181 practice and poor practice. The mean score of the self-report practice of post-operative pain  
 182 management was 10.37 with standard deviation of ( $\pm 2.89$ ). It was calculated based on the  
 183 category specified in the operational definitions. Accordingly this study revealed that, about two  
 184 third (66%) (95% CI: (61, 71)) of the respondents had good postoperative pain management  
 185 practice (**Table 2**).

186 **Table 2:** Practices of nurses on postoperative pain management, working at public hospitals in  
 187 Oromia region, Ethiopia, 2020

| Variables | Yes N (%) | No N (%) |
|-----------|-----------|----------|
|-----------|-----------|----------|

|                                                                                                                                      |            |             |
|--------------------------------------------------------------------------------------------------------------------------------------|------------|-------------|
| Do you assess pain for the patients those able to communicate?                                                                       | 327(86.7%) | 50 (13.3%)  |
| Do you encourage the use of transcutaneous electrical nerve stimulator for pain management?                                          | 4(1%)      | 373(99%)    |
| Do you combine opioids with NSAID's rather than single analgesic agents when managing POP as suggested by World health organization? | 302(80.1%) | 75 (19.9%)  |
| Do you document the findings after pain assessment?                                                                                  | 110(29.2%) | 267 (70.8%) |
| Do you encourage prayer by patients or religious leader postoperatively?                                                             | 206(54.6)  | 171 (45.4%) |
| Do you administer ordered pain medication, around the clock (regularly) as ordered?                                                  | 374(99.2%) | 3(0.8%)     |
| Do you use music therapy to reduce pain?                                                                                             | 2(0.5%)    | 375 (99.5%) |
| Do you reassess pain after giving pain medication in order to evaluate the effectiveness of pain medication?                         | 338(89.7%) | 39 (10.3%)  |
| After surgery, do you provide comfortable positions to help relieve pain?                                                            | 360(95.5%) | 17 (4.5%)   |
| Do you ask and help to support the painful areas when moving or coughing after surgery?                                              | 283(75.1%) | 94 (24.9%)  |
| Do you provide clean, calm and ventilated ward environment for postoperative pain management?                                        | 259(68.7%) | 118 (31.3%) |
| Do you lay patients on neat, well-laid bed postoperatively?                                                                          | 294(78%)   | 83 (22%)    |
| Do you use massage and stretch to reduce postoperative                                                                               | 283(75.1%) | 94 (24.9%)  |

|                                                                                                |            |            |
|------------------------------------------------------------------------------------------------|------------|------------|
| pain?                                                                                          |            |            |
| Do you apply heat and cold compresses to manage POP?                                           | 288(76.4%) | 89 (23.7%) |
| Do you encourage early ambulation/exercise with analgesia?                                     | 347(92%)   | 30 (8%)    |
| Do you encourage use of acupuncture?                                                           | 2(0.5%)    | 375(99.5%) |
| Do you use patient distraction, relaxation, and guided imagery postoperatively to reduce pain? | 131(34.2%) | 246(65.2%) |
| Do you usually dress, bandage, splint and reinforce wound sites postoperatively?               | 359(95.2%) | 18(4.8%)   |

## 188 **Organizational related factors**

189 According to the nurses response regarding the organizational factors majority, 273(72.4%) of  
 190 the participants reported that they have not taken any training regarding postoperative pain  
 191 management while 221(58.3%) did not accessed post-operative pain management guidelines to  
 192 use for practice. Among those received training regarding postoperative pain management  
 193 59(56.7%), 39(37.5%), 2(1.9%) and 4(3.8%) received training by the means of lecturing, course,  
 194 conference and work shop respectively.

## 195 **Factors associated with postoperative pain management practice**

196 To assess the factors associated with the nurses' postoperative pain management practice,  
 197 bivariate analysis was done first. Accordingly, ten of the variables age of the participants, marital  
 198 status, level of education, work experience, experience in postoperative area, current area of  
 199 practice, training related to pain management, access to read pain management guideline,  
 200 knowledge and attitude of the participants regarding POP management were found to be

201 significantly associated with the nurses ‘POP management practice at p-value of 0.25. These  
 202 variables were included in multiple logistic regressions analysis. The model fit was checked by  
 203 Hosmer and Lemeshow test (p-value=0.45) and it was fitted.

204 After adjustment, attitude, getting access to read guidelines, training, knowledge and current area  
 205 of practice were significantly associated with the nurses’ postoperative pain management  
 206 practice. Accordingly, respondents who had Favorable attitude were almost 5 times more likely  
 207 to practice than those who had unfavorable attitude [AOR: 4.698, 95% CI: (2.725, 8.100)].  
 208 Respondents who have taken POP management training were 3.2 times more likely to practice  
 209 than those who did not take such training [AOR: 3.289, 95% CI: (1.461, 7.403)]. Similarly, study  
 210 participants who get access to read pain management guidelines were 3.1 times more likely to  
 211 practice compared to their counterparts [AOR: 3.112, 95% CI: (1.652, 5.862)]. The study also  
 212 revealed that respondents who had adequate knowledge on postoperative pain management were  
 213 2.9 times more likely to practice than those who had inadequate knowledge [AOR: 2.939, 95%  
 214 CI: (1.652, 5.227)] and participants those who were currently practicing in Operation Room were  
 215 2.9 times more likely practice compared with those practicing in medical ward [AOR: 2.934,  
 216 95% CI: 1.267, 6.795 P<0.012] (**Table 3**).

217 **Table 3:** Binary and multiple logistic regression analysis results on factors associated with  
 218 postoperative pain management practice among nurses working at public hospitals in west shoa  
 219 zone, Ethiopia, 2020.

| Variables    | Category | Practice status |             |   | COR at (95% CI) | AOR at (95% CI) | P-value |
|--------------|----------|-----------------|-------------|---|-----------------|-----------------|---------|
|              |          | Good<br>N (%)   | Poor<br>(%) | N |                 |                 |         |
| Age in years | < 25     | 51              | 20          |   | 1.0             |                 |         |

|                                      |            |     |     |                      |                      |       |
|--------------------------------------|------------|-----|-----|----------------------|----------------------|-------|
|                                      | 26--34     | 151 | 89  | 0.665(0.373-1.188)*  | 0.706(0.341-1.465)   | 0.350 |
|                                      | >35        | 47  | 19  | 0.970(0.462-2.038)   | 0.387(0.116-1.294)   | 0.123 |
| Marital status                       | Single     | 109 | 68  | 0.687(0.448-1.054)*  | 1.039(0.566-1.909)   | 0.901 |
|                                      | Married    | 140 | 60  | 1.0                  |                      |       |
| Educational level                    | BSc/above  | 234 | 115 | 1.763(0.812-3.830)*  | 2.495(0.863-7.209)   | 0.091 |
|                                      | Diploma    | 15  | 13  | 1.0                  |                      |       |
| Years of experience                  | <5         | 140 | 94  | 1.0                  |                      |       |
|                                      | 6-9        | 60  | 15  | 2.686(1.440-5.009)*  | 2.301(0.931-5.682)   | 0.071 |
|                                      | >10        | 49  | 19  | 1.732(0.959-3.126)*  | 1.613(0.499-5.217)   | 0.425 |
| Experience in SW                     | <1         | 125 | 74  | 1.0                  |                      |       |
|                                      | 2-4        | 90  | 50  | 1.066(0.680-1.671)   | 1.796(0.387-8.342)   | 0.455 |
|                                      | >5         | 34  | 4   | 5.032(1.717-14.746)* | 0.552(0.266-1.144)   | 0.110 |
| Current area of practice             | MW         | 31  | 34  | 1.0                  |                      |       |
|                                      | EU         | 42  | 27  | 1.706(0.859-3.388)*  | 2.342(0.916-5.989)   | 0.076 |
|                                      | GW         | 48  | 17  | 3.097(1.482-6.470)*  | 1.683(0.708-4.002)   | 0.239 |
|                                      | OR/R       | 45  | 27  | 1.828(0.925-3.614)*  | 2.934(1.27-6.795)**  | 0.012 |
|                                      | SW         | 83  | 23  | 3.958(2.023-7.742)*  | 1.625(0.689-3.833)   | 0.267 |
| Training on POPM                     | Yes        | 78  | 13  | 4.035(2.143-7.599)*  | 3.289(1.461-7.403)** | 0.004 |
|                                      | No         | 171 | 115 | 1.0                  |                      |       |
| Access to pain management guidelines | Yes        | 133 | 23  | 5.234(3.126-8.763)*  | 3.112(1.652-5.862)** | 0.001 |
|                                      | No         | 116 | 105 | 1.0                  |                      |       |
| Knowledge                            | Adequate   | 169 | 38  | 5.003(3.149-7.951)*  | 2.939(1.652-5.227)** | 0.001 |
|                                      | Inadequate | 80  | 90  | 1.0                  |                      |       |

|          |               |     |    |                     |                      |       |
|----------|---------------|-----|----|---------------------|----------------------|-------|
| Attitude | Favorable     | 182 | 42 | 5.562(3.500-8.839)* | 4.698(2.725-8.100)** | 0.001 |
|          | Not favorable | 67  | 86 | 1.0                 |                      |       |

220 Notes: 1.00=Reference, \*p-value<0.25, \*\* statistically significant at P<0.05, SW(surgical ward),

221 MW(medical ward), EU(emergency unit), OR/R(operation or recovery room room).

## 222 Discussion

223 The current study revealed that overall postoperative pain management practices among 66%,  
 224 (95% CI: 61, 71) nurses was found to be good. This finding is lower as compared to the study  
 225 conducted in Rwanda on postoperative pain management, which was 88% (15). However, the  
 226 finding of this study was greater than the study conducted in Addis Ababa in which only 6% of  
 227 them had had good practice and the study done in Arsi zone, southeastern Ethiopia, where nearly  
 228 half (47.9%) of their study participants had good pain management practice(12,16). This  
 229 discrepancy may be due to nursing workload, access to read guideline, sample size, and use of  
 230 different data collection tools. This study revealed that those who had favorable attitude were  
 231 nearly five times more likely to have good postoperative pain management practices than those  
 232 who did not. This is consistent with a study conducted in Addis Ababa and Ghana (13, 16).  
 233 Those who had received training were more than three times more likely to have good pain  
 234 management practices than those who didn't. This finding was comparable with the study  
 235 conducted at Debra Berhan, Northern Ethiopia (17). This is because those individuals who had  
 236 taken POP management training could have current information on pain management which can  
 237 promote the practice. The current study also identified that, those who got access to read pain



238 management guidelines were 3.1 times more likely practices than their counterparts. This finding  
239 is supported by studies conducted in Greece and Debra Berhan (17, 18). This is because  
240 accessibility to refer guidelines can enhance the practices of POP management, according to the  
241 recommended standard. It is also currently the most advisable for clinicians that keeping up-to-  
242 date with evidence-based practice.

243 Individuals who were knowledgeable were nearly three (2.9) times more likely to have good  
244 practice than those who had inadequate knowledge. This finding was in line with the finding  
245 from Rwanda and Arsi zone of southeastern Ethiopia (12, 15). The possible justification is that,  
246 the right knowledge about pain and its management practice can avoids confusion regarding POP  
247 and the disease condition, which can also create clear understanding of its negative impact on the  
248 patients and on health institutions, unless appropriately managed. This study also showed  
249 association between nurses' current working area and level of practice.

## 250 **Conclusion and recommendation**

251 Sixty six percent of participants (nurses) have a good level of practice of postoperative pain  
252 management. Training on post-operative pain management (POPM), access to pain management  
253 guidelines, knowledge and attitude are significant factors in post-operative pain management  
254 practice. Regional health bureau, Zonal health offices, hospital administrations and other  
255 concerned bodies needs to work for enhancing post-operative pain management through  
256 organizing different trainings to improve knowledge and attitude of nurses and timely  
257 distributing standard pain assessment and management guidelines for enhancing accessibility.

## 258 **Abbreviations**

259 OR: operation room

260 POP: post-operative pain

261 SD: Standard deviation

262 SPSS: Statistical Package for the Social Sciences

### 263 **Availability of data**

264 Datasets used are available from the corresponding authors on reasonable request.

### 265 **Ethical and legal Consideration**

266 Ethical clearance was obtained from research Ethics Review committee of Ambo University,  
267 college of medicine and health science. Official letter of cooperation was written from Ambo  
268 University to all public hospitals in the study area. Participants of the study were being informed  
269 that; their participation is voluntary based, the procedures of the data collection, confidentiality  
270 of the collected data, and potential risk and benefits related with participation.

### 271 **Acknowledgments**

272 We would like to thank all zonal health department and hospital administrative in west shoa zone  
273 of Oromia regional state and all study participants for their cooperation.

### 274 **Author Contributions**

275 Abebe Dechasa, Abdo Kurke and Desalegn Abdisa were involved in the selection of design,  
276 development of the research proposal, data analysis, writing up of the different drafts and  
277 finalizing the research. Yonas Gurmu has participated in the reviewing of the different drafts of  
278 the study and drafting the manuscript.

### 279 **Competing interests**

280 The authors declare that there is no conflict of interest in this work.

## 281 **References**

- 282 1. Ceyhan D, MS G. Postoperatif ağrı sadece nosiseptif ağrı mıdır. *Ağrı*. 2010;22(2):47-52.
- 283 2. Jungquist CR, Vallerand AH, Sicoutris C, Kwon KN, Polomano RC. Assessing and  
284 managing acute pain: a call to action. *AJN The American Journal of Nursing*. 2017 Mar  
285 1;117(3):S4-11.
- 286 3. Meissner W, Huygen F, Neugebauer EA, Osterbrink J, Benhamou D, Betteridge N,  
287 Coluzzi F, De Andres J, Fawcett W, Fletcher D, Kalso E. Management of acute pain in  
288 the postoperative setting: the importance of quality indicators. *Current medical research*  
289 *and opinion*. 2018 Jan 2;34(1):187-96.
- 290 4. Global Surgery. *Global Surgery & Anaesthesia Statistics: The Importance of Data*  
291 *Collection*. Harvard, Medical School. 2018.
- 292 5. WHO. *Surgical Care Systems Strengthening*. 2017. 1-45 p.
- 293 6. Gan TJ. Poorly controlled postoperative pain: prevalence, consequences, and prevention.  
294 *Journal of pain research*. 2017;10:2287.
- 295 7. Eshete MT, Baeumler PI, Siebeck M, Tesfaye M, Haileamlak A, Michael GG, Ayele Y,  
296 Irnich D. Quality of postoperative pain management in Ethiopia: A prospective  
297 longitudinal study. *Plos one*. 2019 May 1; 14(5):e0215563.
- 298 8. Corke P. Postoperative pain management. *Australian Prescriber*. 2013 Dec;36(6):202-5.
- 299 9. Chatchumni M, Namvongprom A, Eriksson H, Mazaheri M. Thai Nurses' experiences of  
300 post-operative pain assessment and its' influence on pain management decisions. *BMC*  
301 *nursing*. 2016 Dec;15(1):1-8.

- 302 10. Coyne P, Mulvenon C, Paice JA. American Society for Pain Management Nursing and  
303 Hospice and Palliative Nurses Association position statement: Pain management at the  
304 end of life. *Pain Management Nursing*. 2018 Feb 1;19(1):3-7.
- 305 11. Chou R, Gordon DB, de Leon-Casasola OA, Rosenberg JM, Bickler S, Brennan T, Carter  
306 T, Cassidy CL, Chittenden EH, Degenhardt E, Griffith S. Management of Postoperative  
307 Pain: a clinical practice guideline from the American pain society, the American Society  
308 of Regional Anesthesia and Pain Medicine, and the American Society of  
309 Anesthesiologists' committee on regional anesthesia, executive committee, and  
310 administrative council. *The journal of pain*. 2016 Feb 1;17(2):131-57.
- 311 12. Wurjine T, Nigussie B. Knowledge, attitudes and practices of nurses regarding to post-  
312 operative pain management at hospitals of Arsi zone, Southeast Ethiopia, 2018. *Women's*  
313 *Health*. 2018;7(5):130-5.
- 314 13. Menlah A, Garti I, Amoo SA, Atakro CA, Amponsah C, Agyare DF. Knowledge,  
315 Attitudes, and Practices of Postoperative Pain Management by Nurses in Selected District  
316 Hospitals in Ghana. *SAGE Open Nurs*. 2018 Nov 9;4:2377960818790383. doi:  
317 10.1177/2377960818790383. PMID: 33415201; PMCID: PMC7774443.
- 318 14. Liyew B, Dejen Tilahun A, Habtie Bayu N. Knowledge and Attitude towards Pain  
319 Management among Nurses Working at University of Gondar Comprehensive  
320 Specialized Hospital, Northwest Ethiopia. *Pain Research and Management*. 2020; 2020.
- 321 15. Umuhoza O, Chironda G, Katende G, Mukeshimana M. Perceived knowledge and  
322 practices of nurses regarding immediate post-operative pain management in surgical  
323 wards in Rwanda. A descriptive cross-sectional study. *International Journal of Africa*  
324 *Nursing Sciences*. 2019; 10: 145-51.

- 325 16. Mulugeta E. Assessment of Adult Postoperative Pain Management Practice Among  
326 Nurses Working in Addis Ababa Public Hospitals, Addis Ababa, Ethiopia, 2015.
- 327 17. Dessie M, Asichale A, Belayneh T, Enyew H, Hailekiros A. Knowledge and Attitudes of  
328 Ethiopian Nursing Staff Regarding Post-Operative Pain Management: A Cross-Sectional  
329 Multicenter Study. *Patient Relate Outcome Meas.* 2019;10:395-403. Published 2019 Dec  
330 23. doi:10.2147/PROM.S234521.
- 331 18. Kiekkas P, Gardeli P, Bakalis N, Stefanopoulos N, Adamopoulou K, Avdulla C, Tzourala  
332 G, Konstantinou E. Predictors of nurses' knowledge and attitudes toward postoperative  
333 pain in Greece. *Pain Manag Nurs.* 2015 Feb;16(1):2-10. doi: 10.1016/j.pmn.2014.02.002.  
334 Epub 2014 Jun 26. PMID: 24981120.
